# Supplementary material
Source: PubMed Central journal article supplement (PMC5651203)
Supplement: NIHMS909090-supplement.pdf [file NIHMS909090-supplement.pdf]

## **SUPPLEMENTARY MATERIALS AND METHODS**

### **Human Subjects**

Blister fluids, blood and skin biopsies from EB-affected patients were obtained with the support from DEBRA Chile and DEBRA Mexico according to local rules and regulations. Clinical features of the patients are presented in Table S1. No patient-identifiable information was available to researchers and the study was not considered as human subject research. Foreskins for isolation of human ADSC were collected at Thomas Jefferson University Hospital under institutional review board-approved protocols. The use of discarded tissue for research purpose does not require patient informed consent.

### **Collection of blister fluid and skin biopsies**

Blister fluid was collected from blisters that arose on different parts of the body (Table S1) as needle aspirates. Age of the blister (<24 hour or >98 hours) was reported by patients. Blood and blister fluid samples were collected at the same time. For several samples, the blister fluid was collected along with skin biopsy.

### **Isolation of human adipose-derived stem cells (ADSC)**

Human ADSC were isolated according to the established protocols (Alexeev, 2014). The resultant CD31<sup>-</sup>CD45<sup>-</sup> population defined as ADSC was grown in DMEM/F12-Glutamax media supplemented with 10% FBS and Penicillin/Streptomycin (Thermo/Fisher, Grand Island, NY).

### **Human peripheral blood mononucleated cells (PBMC)**

Human PBMC were purchased from Stem Cell Technologies (Cambridge, MA). Cells were cultured in RPMI1640 media supplemented with 10% FBS, Penicillin/Streptomycin and 20 mM HEPES, pH 7.3 (Thermo/Fisher, Grand Island, NY).

### **PBMC gating strategy**

Gating of different leukocyte populations was done based on the assessment of side scatter (SSC) versus forward scatter (FSC). Since FSC represents size and SSC complexity of the internal structure, differentiation of cell types in heterogeneous PBMC-derived population was done based on the correlative measurements of the FSC and SSC, according to standard distribution of the cell types.

### **Chemokine and cytokine antibody arrays**

Human Chemokine Antibody Arrays C1 series and Human Cytokine Antibody Array C1000 series (Ray Biotech, Inc., Norcross, GA) were used in the study. Twenty  $\mu$ l of blister fluids (BF) or plasma were incubated with array membranes overnight at +4°C following detection protocol as devised by the manufacturer. Relative spot intensity was measured using ScanAlyse Software (Stanford, CA). Data analysis was done using RayBio<sup>®</sup> Human Chemokine and Cytokine Antibody Array Analysis Tools software (RayBiotech, Inc. Norcross, GA). Individual background values were subtracted and spot intensities were normalized according to positive control signals. Relative spot intensities are presented as means  $\pm$  SDs.

### **ELISA assay**

Assessment of most common human chemokines in BF was done using Multi-Analyte ELISArray kit (Qiagen, Valencia, CA) as advised by manufacturer. Quantitation of angiogenin was done using angiogenin-specific ELISA kit (Ray Biotech, Inc., Norcross GA) with angiogenin standards according to manufacturer protocol. Colorimetric reaction was measured using  $\mu$ Quant plate reader and analyzed using KC Junior software (Bio-Tech Instruments, Inc., Winooski, VT). To offset the non-specific antibody reaction, the OD value of control antigen was subtracted from that of each sample. Assays were conducted in triplicate, and these means were used for data analysis.

### **Fluorescence-activated cell sorting (FACS) analysis**

FACS-based analysis was done using chemokine receptor-specific FITC-, Alexa488-, PerCP/Cy5.5- or PE-conjugated antibodies (BioLegend, San Diego, CA) (Table S2). Labeling of cells was done according to manufacturer recommendation. Briefly, cells were incubated with receptor-specific antibodies for 30 minutes at 4°C following washes in FACS buffer containing 0.5% FBS. Cells were fixed with 1% paraformaldehyde (PFA) in PBS (pH 7.4) and washed in FACS buffer. Cell surface expression of chemokine-receptors was assessed on the Guava EasyCyte system and analyzed using GuavaSoft 2.7 software (Millipore, Billerica, MA).

### **Histological and immunofluorescence analyses**

EB skin samples were transported in Michele's Transport Media (American MasterTech Scientific, Inc., Lodi, CA). Samples were embedded in Optimal Cutting Temperature (OCT) compound (Sakura Finetek USA, Inc., Torrance, CA), frozen, and cryosectioned. Seven micron sections were fixed in 4% PFA in PBS and used for indirect immunofluorescence analysis. A list of the primary antibodies is provided in Table S2. After blocking with 1% BSA in PBS for 1 h, sections were incubated with primary antibodies overnight at +4°C. Immunocomplexes were detected with AlexaFluor<sup>488</sup>- and/or AlexaFluor<sup>594</sup>-labeled secondary antibodies (Thermo/Fisher, Grand Island, NY). Nuclei were stained with 4',6-diamidino-2-phenylindole (DAPI) (Sigma, St. Louis, MO). Slides were covered with Fluorosafe reagent (Millipore, Billerica, MA) and analyzed by fluorescent microscopy.

### ***In vitro* migration in Transwell chambers**

PBMC ( $3 \times 10^6$  cells) or ADSC ( $1 \times 10^6$  cells) in 250  $\mu$ l of culture media were loaded into the top chamber of the 8- $\mu$ m pore size Transwell. Control or BF-containing culture media was placed into a lower chamber. At indicated time points, cells were aspirated and removed from the top chamber. Cells that migrated to the undersides of the porous membrane and to the lower chamber were collected and used for analysis.

### **Migration in collagenous matrix**

For the assessment of ADSC migration in collagenous matrix, cultures were initiated by preparing an acellular collagenous layer (100  $\mu$ l) on top of the porous membrane of the 12-well Transwell chamber by mixing 10x Eagle's MEM, L-glutamine, dialyzed FBS,

NaHCO<sub>3</sub>, and rat tail type I collagen. After polymerization, a cellular layer was created by mixing the same components with  $5 \times 10^4$  Vybrant DiO-labeled ADSC per well (200  $\mu$ l). After polymerization, a separating acellular layer (600  $\mu$ l) was created on top. The migration unit was completed by the formation of the acellular layer with or without BF (100  $\mu$ l) (BF diluted at 1:10 ratio). When completed, migration units were placed into a Transwell plate and culture media was added to the lower chamber and on the top of the migration unit. Plates were incubated for 4 days under standard tissue culture condition. On the second and third days, BF (1:10 ratio) was added on top of the migration units. After 4 days, migration units were fixed in 10% buffered formalin for 4 h at room temperature and frozen in OCT compound. Ten  $\mu$ m cryosections were used for direct and indirect immunofluorescence analysis.

### **Plasmid DNA construction and delivery using Amaxa nucleofection**

cDNA encoding human CXCR1 and CXCR2 chemokine receptors were generated from total RNA isolated from human PBMC using SurepScript III reverse transcriptase (Thermo/Fisher, Grand Island, NY), following amplification of the cDNA using PfuUltra II fusion HS DNA polymerase (Agilent technologies, Santa Clara, CA) with gene-specific primers. The resultant cDNA was ligated into pEF6-TOPO mammalian expression vector (Thermo/Fisher, Grand Island, NY) under the control of the human elongation factor 1 promoter. Integrity of the plasmids and expression of the proteins were assessed by direct DNA sequencing. Expression of CXCR1 and CXCR2 from the resultant plasmids was verified by RT-PCR and Western blot analyses. Amaxa nucleofection reaction was used for plasmid DNA delivery into ADSC. The Amaxa Nucleofector II device with Kit V was used (Lonza, Basel, Switzerland). ADSC ( $1 \times 10^6$  cells per reaction) were mixed with nucleofection solution and DNA per manufacturer protocol. The T-027 program was used

for nucleofection. After the reaction, cells were incubated in standard tissue culture conditions, analyzed for protein expression and used in experiments.

**Table S1. Source of blister fluid samples collected from patients affected with different types of epidermolysis bullosa.**

| EB type <sup>1</sup>     | Age (years) | Gender <sup>2</sup> | Location of blister                                                 | Country of Origin |
|--------------------------|-------------|---------------------|---------------------------------------------------------------------|-------------------|
| <b>RDEB</b>              |             |                     |                                                                     |                   |
| RDEB, generalized        | 2           | M                   | Neck                                                                | Mexico            |
| RDEB, generalized        | 2           | M                   | Forehead                                                            | Mexico            |
| RDEB                     | 2           | F                   | Left thigh, Left ankle, Right foot                                  | Chile             |
| RDEB, generalized        | 5           | F                   | Left palm, Left leg                                                 | Mexico            |
| RDEB, generalized severe | 6           | F                   | Left palm, Left thigh, Right leg                                    | Mexico            |
| RDEB, generalized        | 7           | M                   | Left palm, Right leg                                                | Mexico            |
| RDEB, generalized        | 11          | F                   | Left palm, Right upper arm, Right leg                               | Mexico            |
| RDEB, generalized severe | 11          | F                   | Left abdomen, Left thigh, Right upper arm, Left lumbar, Right thigh | Chile             |
| RDEB, generalized        | 12          | F                   | Right hand, Left palm, Forehead                                     | Mexico            |
| RDEB                     | 12          | F                   | Left palm, Left thigh, Left ankle                                   | Chile             |
| RDEB, generalized        | 14          | F                   | Left hand, Back                                                     | Mexico            |
| RDEB, generalized        | 15          | F                   | Left palm, left thigh, Right arm                                    | Mexico            |
| RDEB, generalized severe | 15          | M                   | Right hand, Left palm, Right ankle, Right heel, Left leg            | Chile             |
| RDEB, generalized severe | 17          | M                   | Right back shoulder, Right forearm, Left knee                       | Chile             |
| RDEB, generalized        | 19          | F                   | Left hand, Right forearm, Left knee, Upper back                     | Mexico            |
| RDEB, generalized        | 21          | F                   | Left hand, Left leg                                                 | Mexico            |
| RDEB, generalized        | 28          | M                   | Left palm, Left leg                                                 | Mexico            |
| RDEB, generalized        | 30          | M                   | Left palm, Right leg                                                | Mexico            |
| RDEB, generalized severe | 30          | F                   | Left wrist, Left palm, Left elbow                                   | Chile             |
| RDEB, generalized        | 33          | F                   | Left palm, Neck, Left leg                                           | Mexico            |
| RDEB, generalized        | 44          | F                   | Right hand, Right leg                                               | Mexico            |
| RDEB, generalized        | 45          | F                   | Left palm, Right arm                                                | Mexico            |
| RDEB, generalized        | 47          | F                   | Left forearm, Left palm, Left upper arm                             | Mexico            |
| <b>EBS</b>               |             |                     |                                                                     |                   |
| EBS                      | 2           | F                   | Left palm, Right leg                                                | Mexico            |

|                               |      |   |                                              |        |
|-------------------------------|------|---|----------------------------------------------|--------|
| EBS                           | 4    | F | Left leg, Right hand                         | Mexico |
| EBS                           | 5    | F | Left hand, Right leg                         | Mexico |
| EBS                           | 15   | M | Left palm, Right Foot                        | Mexico |
| EBS                           | 52   | F | Right inguinal, Right abdomen                | Chile  |
| <b>JEB</b>                    |      |   |                                              |        |
| JEB, generalized intermediate | 3 mo | F | Pelvis, Right lumbar waist, Right lumbar hip | Chile  |
| JEB, generalized intermediate | 4    | M | Right leg                                    | Chile  |
| JEB, generalized severe       | 8    | M | Left leg, Right thigh                        | Chile  |
| <b>DDEB-pruriginosa</b>       |      |   |                                              |        |
| DDEB, pruriginosa             | 30   | F | Arm                                          | Mexico |
| DDEB, pruriginosa             | 34   | F | Left leg                                     | Mexico |

<sup>1</sup>EB type included recessive dystrophic epidermolysis bullosa (RDEB), epidermolysis bullosa simplex (EBS), junctional epidermolysis bullosa (JBS), dominant dystrophic epidermolysis bullosa (DDEB).

<sup>2</sup>Gender: M-male; F-female.



| <b>Antigen</b> | <b>Manufacturer</b> | <b>Catalog number</b> | <b>Application<sup>1</sup></b> | <b>Fluorochrome</b> | <b>Dilution</b> |
|----------------|---------------------|-----------------------|--------------------------------|---------------------|-----------------|
| CXCR1          | BioLegend           | 320608                | FACS                           | PE                  | 1:20            |
| CXCR2          | BioLegend           | 320712                | FACS                           | 488                 | 1:20            |
| CCR2           | BioLegend           | 357205                | FACS                           | PE                  | 1:20            |
| CCR3           | BioLegend           | 310719                | FACS                           | FIT-C               | 1:20            |
| CCR4           | BioLegend           | 359411                | FACS                           | PE                  | 1:20            |
| CCR5           | BioLegend           | 313710                | FACS                           | 488                 | 1:20            |
| CD45           | BD Pharmingen       | 555480                | IF frozen                      | unconjugated        | 1:200           |
| CXCR2          | Bioss               | bs-1629R              | IF frozen                      | unconjugated        | 1:100           |
| CXCR1          | Abcam               | ab14936               | IF frozen                      | unconjugated        | 1:50            |
| CD45RO         | Dako                | M0742                 | IF frozen                      | unconjugated        | 1:200           |
| CD45RA         | eBioscience         | 14-0458-82            | IF frozen                      | unconjugated        | 1:200           |
| CD11b          | ThermoFisher        | MA1-91659             | IF frozen                      | unconjugated        | 1:100           |
| CD16b          | BD Pharmingen       | 555404                | IF frozen                      | unconjugated        | 1:50            |

The commercial antibodies used in this study are listed together with their source and the method of usage.

<sup>1</sup>Antibodies were used for fluorescence activated cell sorting (FACS) and indirect immunofluorescence (IF) staining on frozen sections.

Figure S1.



Figure S1. Array analysis of chemokines in early and advanced blisters. Chemokines were assessed by antibody array in blister fluids from early and advanced blister (as indicated). Data is presented as a mean pixel density  $\pm$  SD for each EB type.

**Figure S2**



Figure S2. Amaxa nucleofection and CXCR2 expression in primary ADSC. (a) Representative micrograph depicting uniform expression of the green fluorescent protein (green) in human primary ADSC nucleofected with pMaxGFP plasmids (Lonza, Basel, Switzerland) detected as direct fluorescence 72 h after nucleofection. Scale bar - 100  $\mu$ m. Percentage of GFP-positive cells is shown to the right of the image. (b) Representative profiles of control (open) and CXCR2-transduced (shaded) ADSC assessed by FACS 72 h after nucleofection of ADSC with pEF1-hCXCR2 plasmid. Percentage of CXCR2<sup>+</sup> cells is shown in the density plot.

**Figure S3**



Figure S3. Quantitation of Angiogenin in blister fluids by ELISA assay. Angiogenin was quantitated by ELISA (Ray Biotech) against angiogenin standard. Blister fluids were diluted 10 times and used for the analysis. Data is presented as mean angiogenin concentration (pg/ml)  $\pm$  SD. EB types and total number of samples used for the analysis indicated below the columns.

Figure S5a



Figure S5a. Infiltration of the DEB-, JEB- and EBS-affected blistering and non-blistering skin with CD45<sup>+</sup> leukocytes. Detected antigens are shown in individual channels: CXCR2 - Red and CD45 -Green. Blue - DAPI nuclear staining. RGB images represent merged red, green and blue channels. BC - blister cavity. White arrowheads point to representative groups of CXCR2<sup>+</sup> CD45<sup>+</sup> leukocytes. Scale bar - 100  $\mu$ m.

Figure S5c



Figure S5c. Characterization of skin-infiltrating CXCR2<sup>+</sup> cells in control and EB-affected skin. Detected antigens are shown in individual channels: CXCR2 - Red and CD11b or CD16b - Green. Blue - DAPI nuclear staining. RGB images represent merged red, green and blue channels. Scale bar - 100  $\mu$ m.

Figure S6c



Figure S6c. Analysis of blister fluid-induced ADSC migration in collagenous matrix. Detected antigens are shown above the panels in individual channels: CXCR1<sup>+</sup> or CXCR2<sup>+</sup> - Red and vibrant DiO-labeled ADSC - Green. Blue - DAPI nuclear staining. RGB images represent merged red, green and blue channels. Scale bar - 100  $\mu$ m.
